# Supplementary material
Source: PubMed Central journal article supplement (PMC4685712)

**A**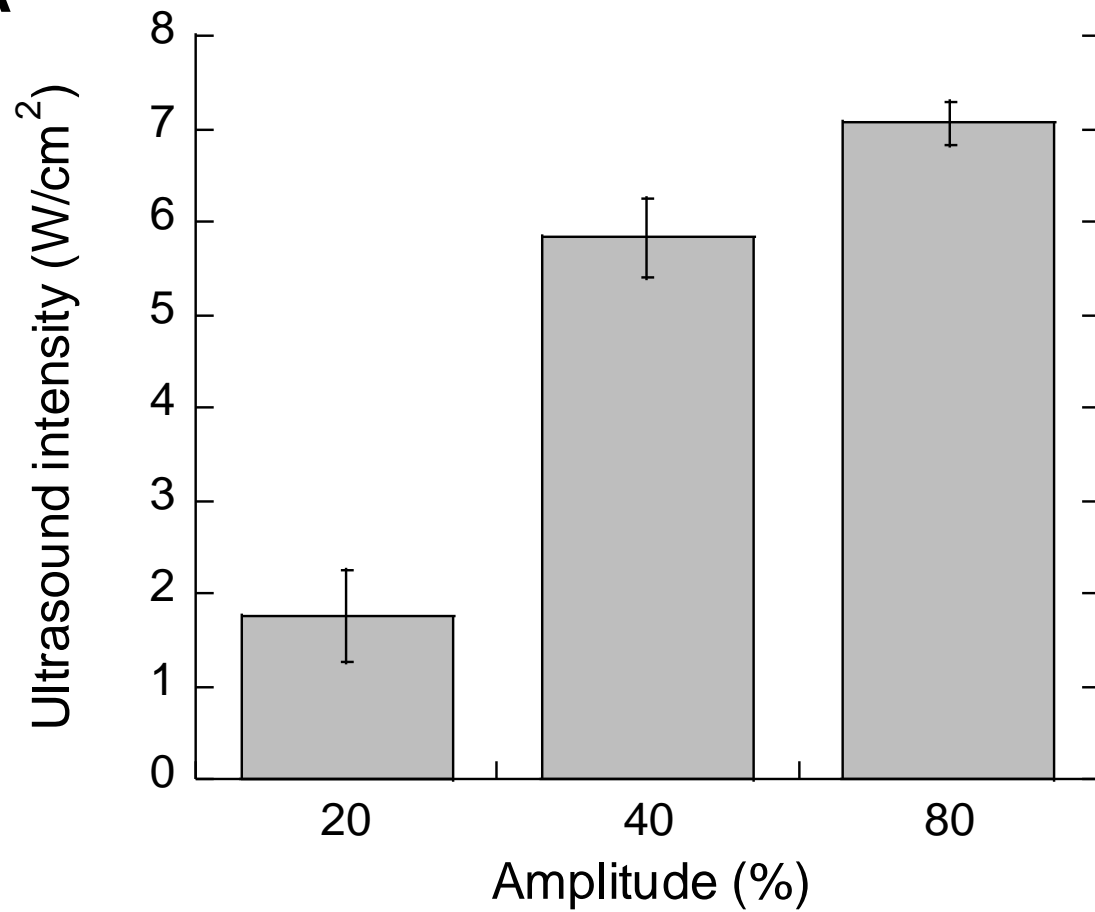**B**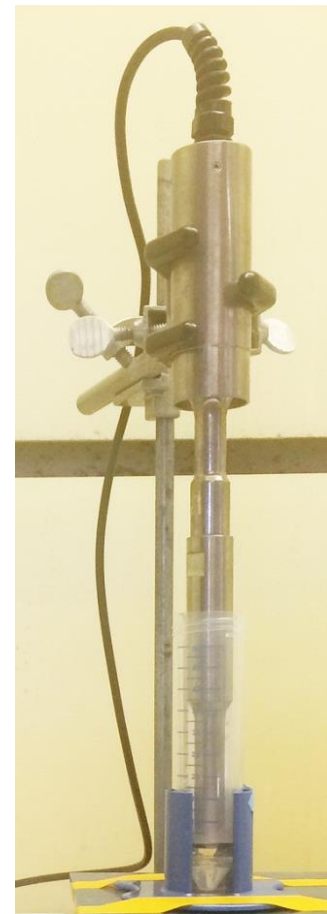

Supplement: NIHMS730558-supplement-1.pdf [file NIHMS730558-supplement-1.pdf]
